# Supplementary material for: Layer number-dependent optoelectronic characteristics of quasi-2D PBA2(MAPbBr3)n−1PbBr4 perovskite films
Source: Royal Society of Chemistry journal article supplement (doi:10.1039/d1tc03891e), 2021-01-01
Supplement: d1tc03891e1.pdf [file d1tc03891e1.pdf]

**Supporting Information for**

**Layer Number dependent Optoelectronic Characteristics of quasi-2D**

**PBA<sub>2</sub>(MAPbBr<sub>3</sub>)<sub>n-1</sub>PbBr<sub>4</sub> perovskite films**

Lianfei Yao<sup>a</sup>, Xue Lou<sup>a</sup>, Ning Sui<sup>\*a</sup>, Zhihui Kang<sup>a</sup>, Qiang Zhou<sup>b</sup>, Li Li<sup>c</sup>, Bing Zhao<sup>d</sup>,  
Han-zhuang Zhang<sup>a</sup>, Jiaqi Zhang<sup>\*c</sup>, Yinghui Wang<sup>\*a</sup>.

- <sup>a</sup> Femtosecond Laser laboratory, Key Laboratory of Physics and Technology for Advanced Batteries (Ministry of Education), College of Physics, Jilin University, Changchun 130012, China.
- <sup>b</sup> State Key Laboratory of Superhard Materials, College of Physics, Jilin University, Changchun 130012, China.
- <sup>c</sup> College of Physics and Optoelectronic Engineering, Harbin Engineering University, Harbin, 150001, China.
- <sup>d</sup> State Key Laboratory of Supramolecular Structure and Materials, Jilin University, Changchun 130012, China.
- <sup>e</sup> Key Laboratory of Automobile Materials, Ministry of Education, College of Materials Science and Engineering, Jilin University, Changchun 130012, China.

## S1. Fit to FWHM of PL Spectra under Different Temperature

The integrated PL intensity (IPLI) and FWHM of the PL spectra are calculated through full peak fitting to PL spectrum. The emission line width dependent on temperature can be described by a Bose-Einstein statistics:

$$\Gamma(T) = \Gamma_0 + \Gamma_{LA}T + \Gamma_{LO} \frac{1}{e^{E_{LO}/k_B T} - 1} + \gamma_{imp} \frac{1}{e^{-E_b/k_B T}}$$

Here,  $\Gamma_0$  is inhomogeneous broadening term independent on temperature.  $\Gamma_{LA}$  is homogeneous broadening term, arising from acoustic phonon scattering.  $\Gamma_{LO}$  and  $E_{LO}$  are scattering intensity and energy of longitudinal optical (LO) phonon, respectively. And the last term denotes the contribution of impurities on the line width, which is neglected in further calculation.

The broadening of FWHM with the temperature is much dependent of the carrier scattering caused by carrier-phonon interaction. In general, there are four sources to scatter the carriers causing broadening the PL, inhomogeneous broadening without temperature dependence, acoustic phonon scattering, LO phonon scattering via the Fröhlich interaction and impurities scattering, respectively. However, if impurity contribution is dominant at PL broadening, there will be a saturation at high temperature in the temperature dependence of FWHM. Or, in the case of dominant scattering by acoustic phonons, the line width broadens linearly with increasing temperature.

## S2. Fit to the PL Intensity under Different Temperatures

The trend of PL intensity with temperature can be expressed by the Arrhenius equation:

$$I(T) = I_0 / (1 + Ae^{-E_B/k_B T})$$

where  $I_0$  is the intensity at 0 K;  $k_B$  is Boltzmann constant and  $E_B$  is exciton binding energy.

### S3. Calculation of Temperature-Dependent PLQY

The PL quantum yield (QY) can be defined as the ratio of the number of emitted photons to the number of absorbed photons by a luminescent material:

$$QY = \frac{N_{em}}{N_{abs}} = \frac{\int \frac{\lambda}{hc} [I_{em}^{sample}(\lambda) - I_{em}(\lambda)] d\lambda}{\int \frac{\lambda}{hc} [I_{ex}(\lambda) - I_{ex}^{sample}(\lambda)] d\lambda}$$

The most straightforward method for the determination of QY values presents the absolute measurement of  $N_{abs}$  and  $N_{em}$  with an integrating sphere setup. Here,  $\lambda$  is the wavelength;  $h$  is Planck's constant;  $c$  is the velocity of light;  $I_{ex}^{sample}$  and  $I_{ex}$  are the integrated intensities of the excitation light with and without a sample, respectively.

The PLQY at low temperature  $QY_2$  can be obtained from  $QY_1$  at room temperature:

$$\frac{QY_2}{QY_1} = \frac{I_{em2}}{I_{em1}} \times \frac{A_1}{A_2} \times \frac{\lambda_{ex1}}{\lambda_{ex2}} \times \frac{\eta_2}{\eta_1}$$

Here,  $I_{em}$  is the integrated area under the corrected emission spectrum;  $A$  is the absorbance at the excitation wavelength;  $\lambda_{ex}$  is the excitation wavelength;  $\eta$  is the collection efficiency of the system.

### S4. Derivation of radiative lifetimes from measured PL dynamics

The PL decay can be described by:

$$I_{PL}(t) = \sum_{i=1}^n k_i \exp\left(-t/\tau_X^i\right)$$

where  $\tau_X^i$  is the effective lifetime given by:

$$\tau_X^i = \tau_{r,X} \tau_{nr,X}^i / (\tau_{r,X} + \tau_{nr,X}^i)$$

$k_i$  is the relative fraction of perovskite film in the  $i$ -th sub-ensemble.

The PLQY of the individual sub-ensemble is given by:

$$q_i = \tau_X^i / \tau_{r,X}$$

And the total PLQY of the entire sample (Q) can be expressed as:

$$Q = \sum_{i=1}^n k_i q_i = \tau_{r,X}^{-1} \sum_{i=1}^n k_i \tau_X^i$$

So, the radiative lifetime is expressed as:

$$\tau_{r,X} = Q^{-1} \sum_{i=1}^n k_i \tau_X^i = Q^{-1} \langle \tau_X \rangle$$

where  $\langle \tau_X \rangle$  is the average lifetime.

## S5. The exciton binding energy scaling law

The general empirical scaling law of the exciton binding energies based on a classical model for low dimensional systems can be described as:

$$E_b = \frac{E_0}{\left(1 - \frac{\gamma e^{-\frac{L_W}{2a_0}}}{2}\right)^2}$$

where  $E_0$  and  $a_0$  are the 3D Rydberg energy and Bohr radius of 3D perovskite, respectively, and  $L_W$  is the physical width of the quantum well.

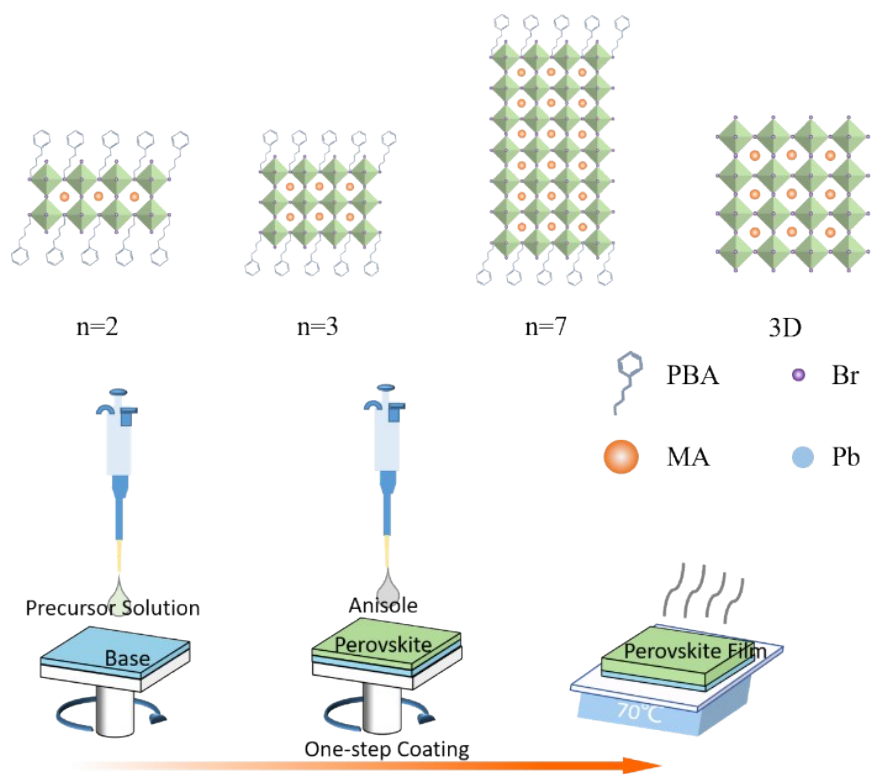

**Scheme S1.** The spin-coating process of perovskite film preparation and the perovskite structure of 2D ( $\text{PBA}_2(\text{MAPbBr}_3)_{n-1}\text{PbBr}_4$ ) films for  $n = 2$  (#1),  $n = 3$  (#2),  $n = 7$  (#3) and 3D ( $\text{MAPbBr}_3$ ) for thick (#4) and thin (#5) films.

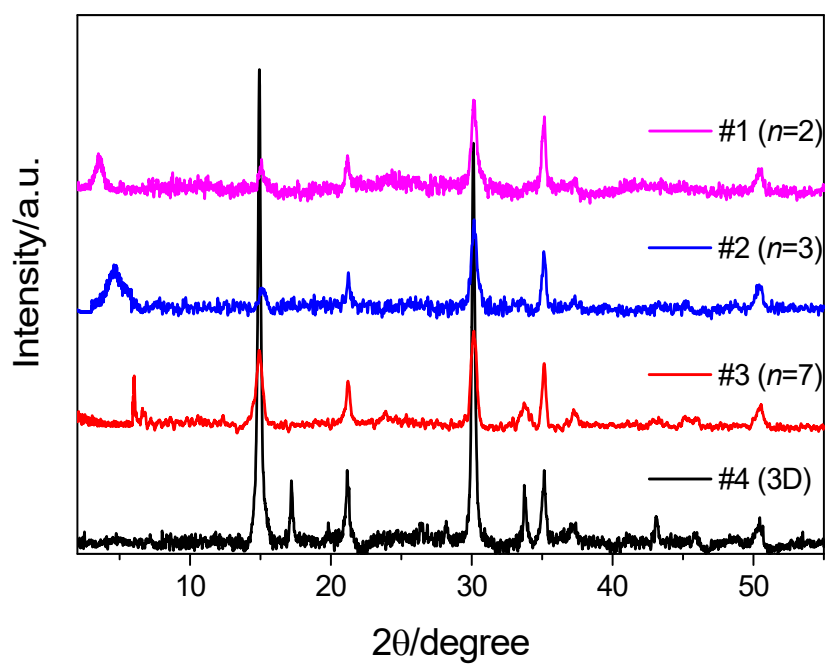

**Fig. S1.** The XRD patterns of #1, #2, #3 and #4.

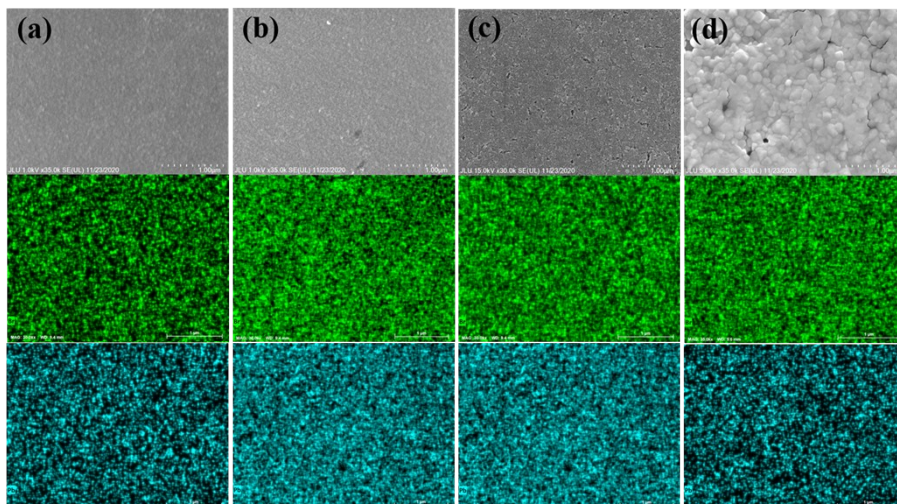

**Fig. S2.** SEM images and element mapping (Pb for blue and Br for green) of #1 (a), #2 (b), #3 (c) and #4 (d).

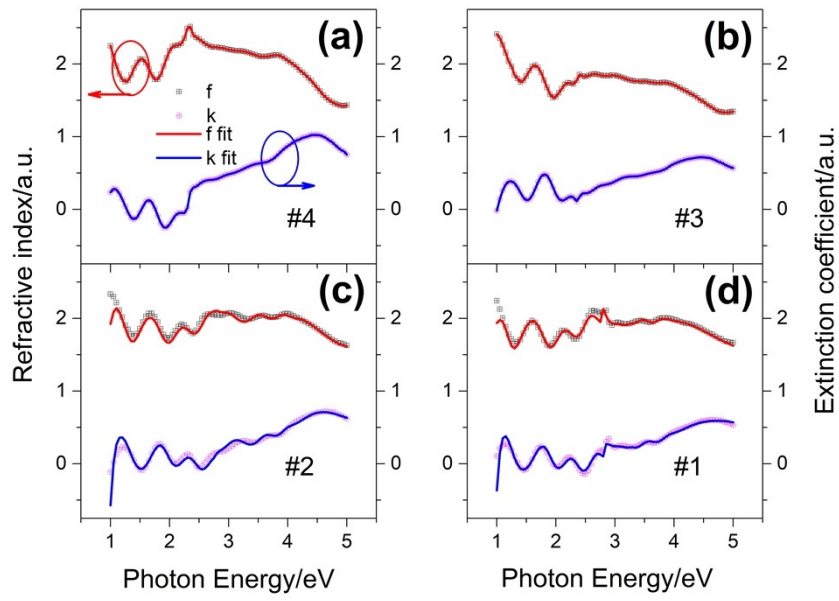

**Fig. S3.** Ellipsometric experimental spectra and simulated refractive and extinction coefficients dispersion relationship of #4, #3, #2 and #1. The f represents refractive index, and the k represents extinction coefficient.



**Table S1.** The parameters of perovskite films by fitting ellipsometric spectra, where the  $f_{\text{PL}}$  and  $k_{\text{PL}}$  are refractive index and extinction coefficient at PL peak position of perovskite films, respectively.

| Perovskite | $f_{\text{PL}}$<br>(a.u.) | $k_{\text{PL}}$<br>(a.u.) | Thickness<br>(nm) | Surface Roughness<br>(nm) |
|------------|---------------------------|---------------------------|-------------------|---------------------------|
| #1         | 2.11                      | 0.01                      | 232.09            | 17.45                     |
| #2         | 1.83                      | 0.03                      | 198.21            | 15.23                     |
| #3         | 1.77                      | 0.11                      | 183.77            | 19.46                     |
| #4         | 2.54                      | 0.24                      | 201.32            | 18.21                     |

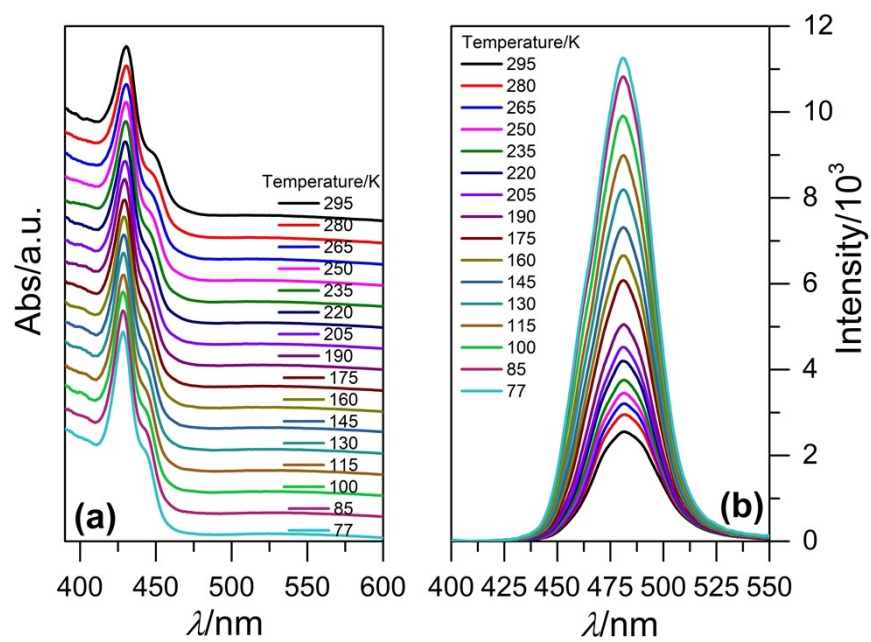

**Fig. S4.** Temperature-dependent absorption (a) and PL (b) spectra of #1.

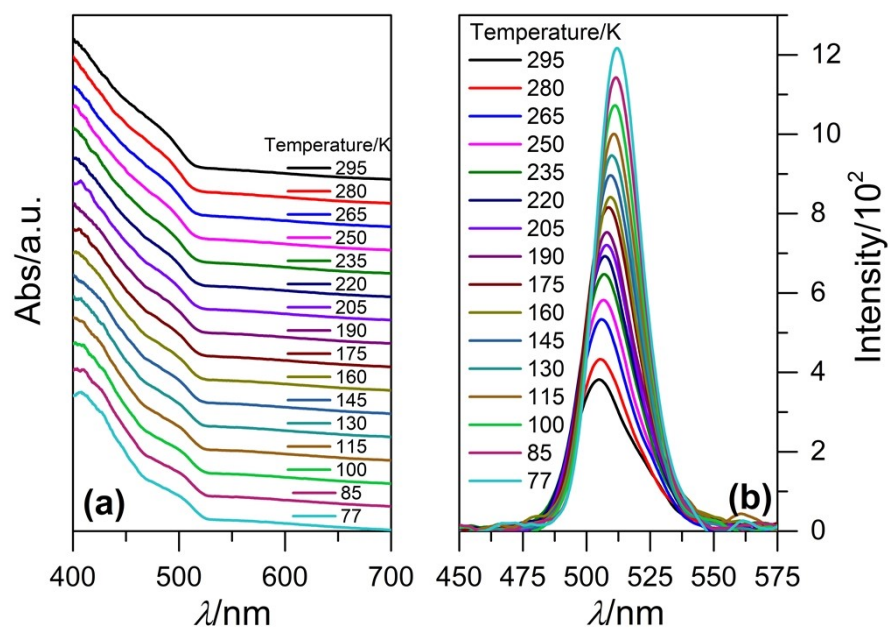

**Fig. S5.** Temperature-dependent absorption (a) and PL (b) spectra of #2.

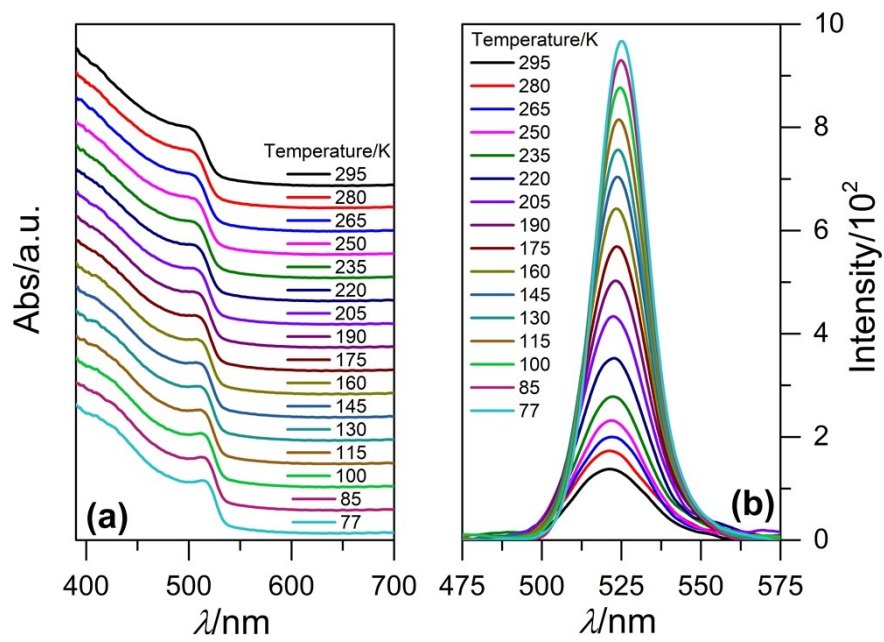

**Fig. S6.** Temperature-dependent absorption (a) and PL (b) spectra of #3.

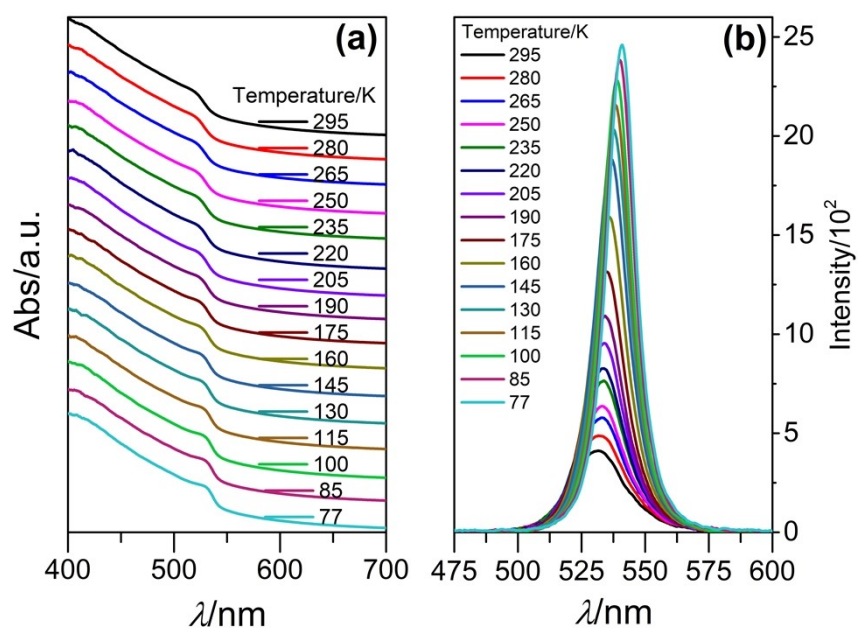

**Fig. S7.** Temperature-dependent absorption (a) and PL (b) spectra of #4.

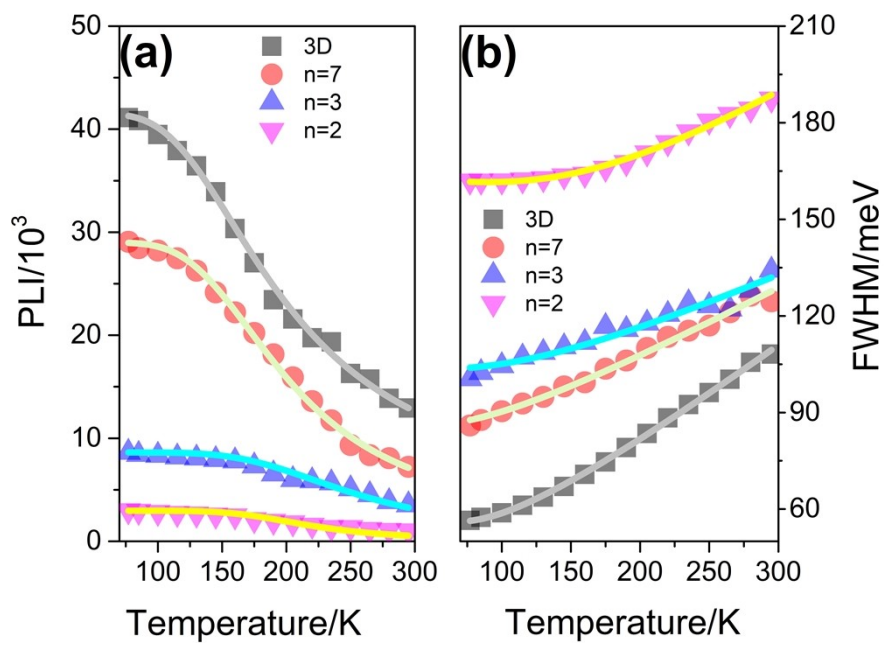

**Fig. S8.** Integrated PL intensity (a) and FWHM (b) as a function of temperature #4 (3D), #3 ( $n = 7$ ), #2 ( $n = 3$ ) and #1 ( $n = 2$ ).

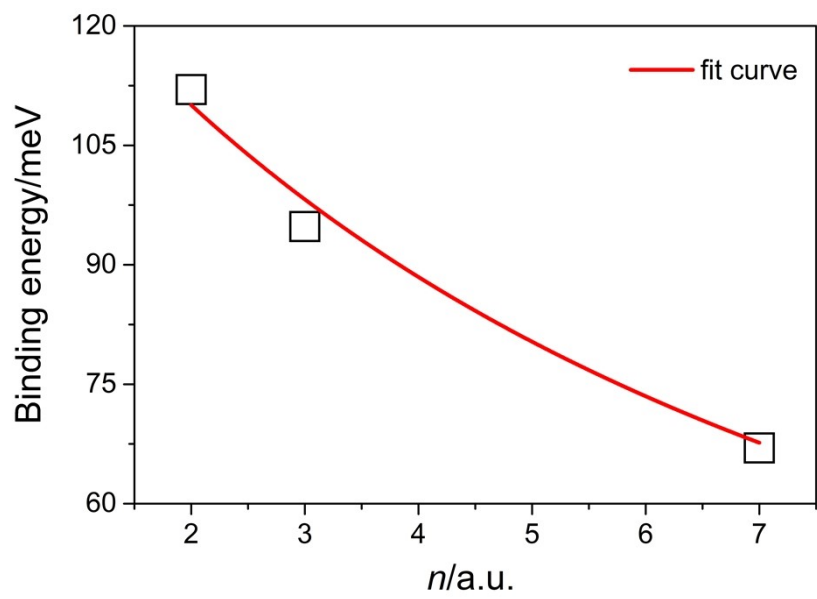

**Fig. S9.** The dependence between binding energy and film layer number.

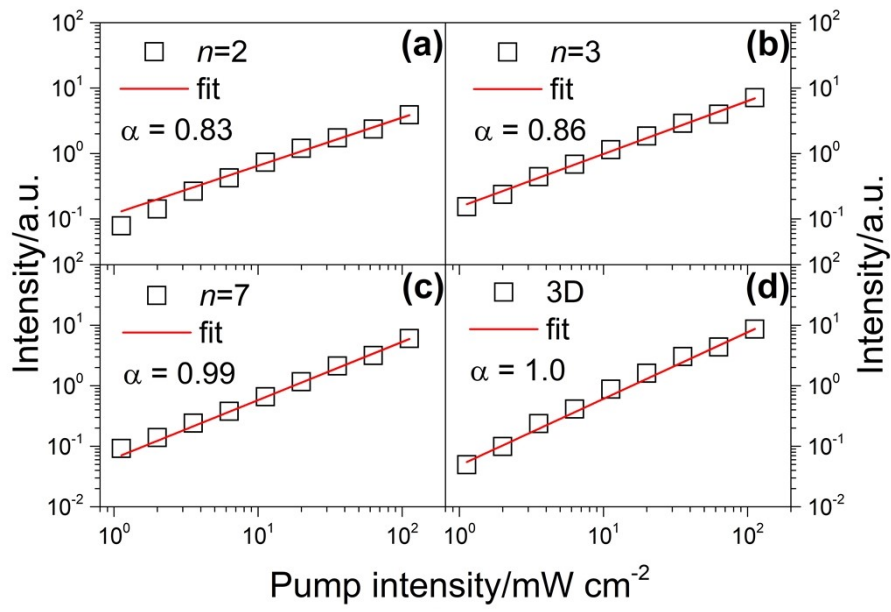

**Fig. S10.** The dependence between PL intensity and pump intensity which is fitted by the  $I_{\text{PLI}} = C P_{\text{EI}}^\alpha$ .



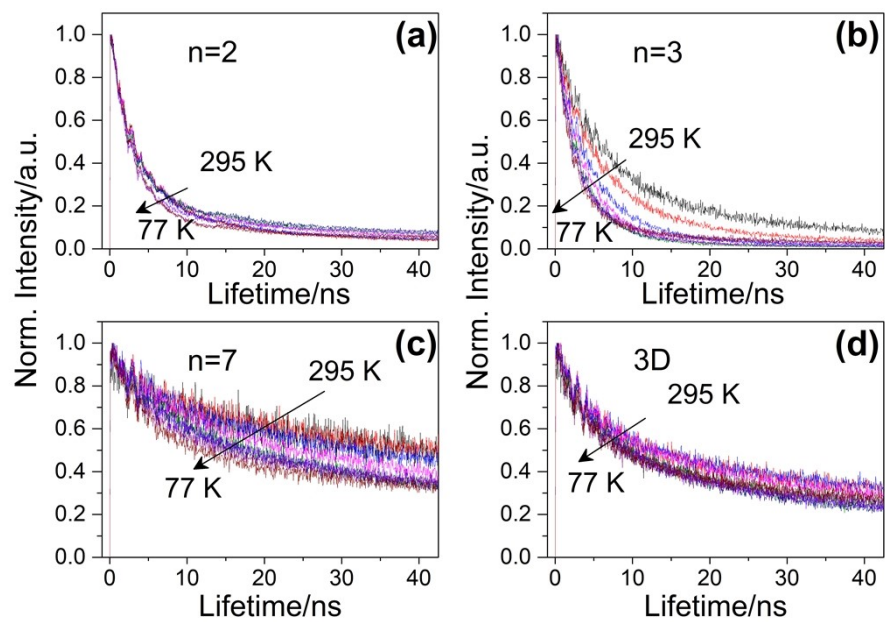

**Fig. S11.** Normalized PL decays of perovskite films with different layers at different temperatures.

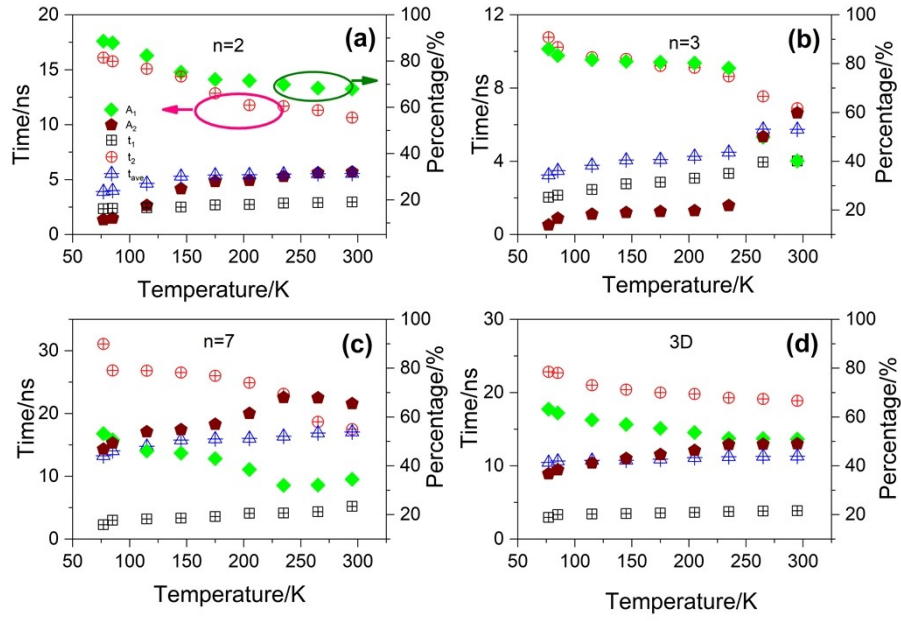

**Fig. S12.** The bi-exponential fitting parameters for normalized PL decay curves, where  $t_1$  and  $t_2$  are time parameters;  $A_1$  and  $A_2$  are the percentages of time parameters;  $t_{\text{ave}}$  is average lifetime.

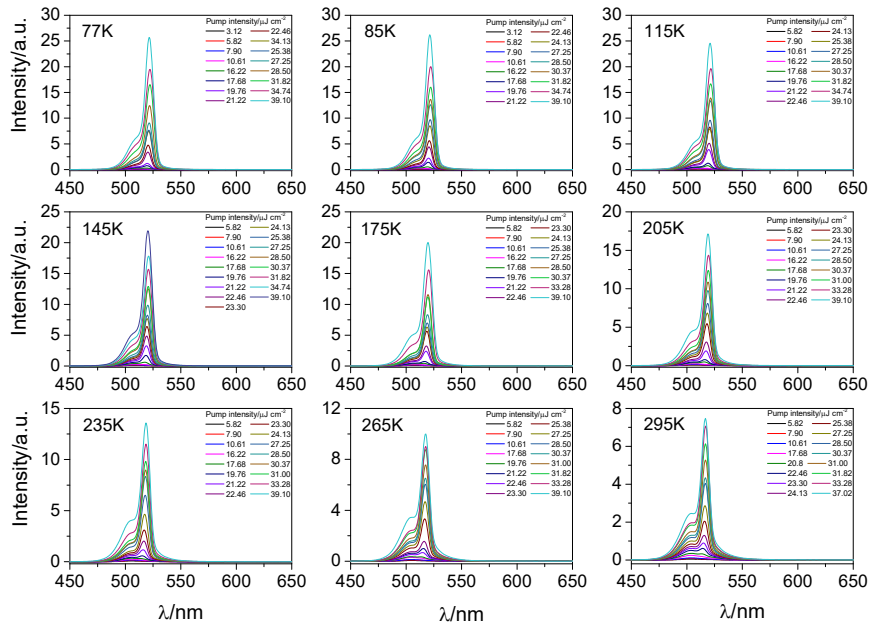

**Fig. S13.** Power-dependent emission spectra from #2 at different temperatures.

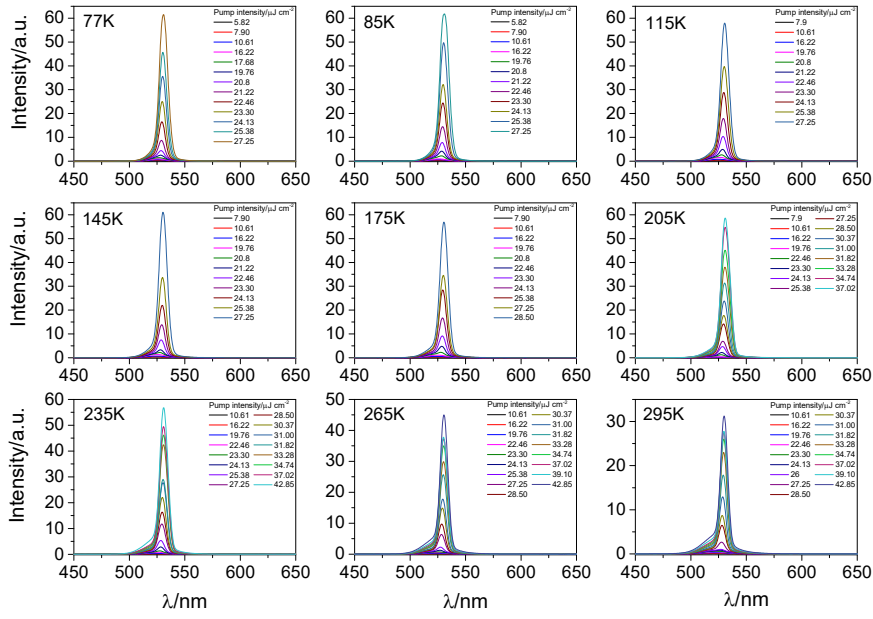

**Fig. S14.** Power-dependent emission spectra from #3 at different temperatures.

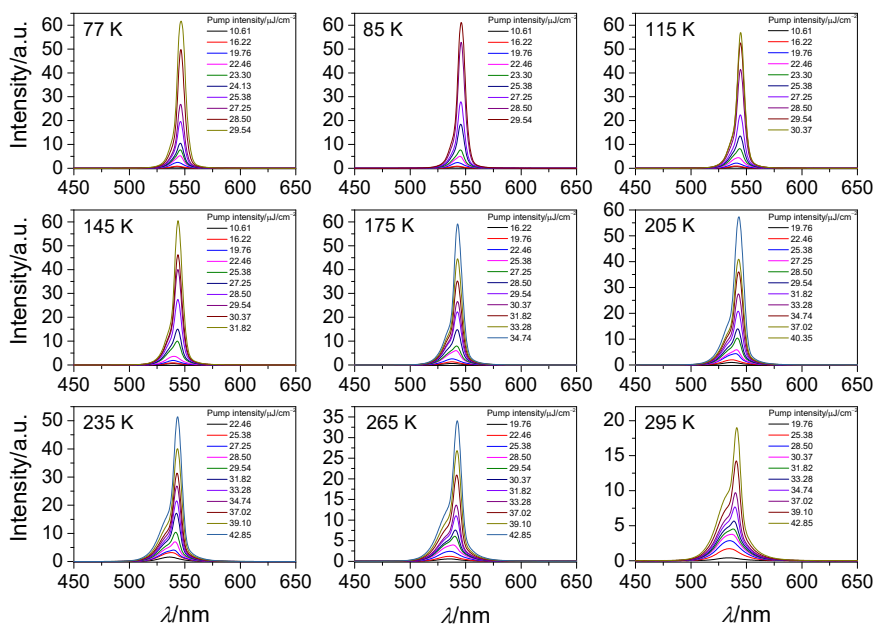

**Fig. S15.** Power-dependent emission spectra from #4 film at different temperatures.

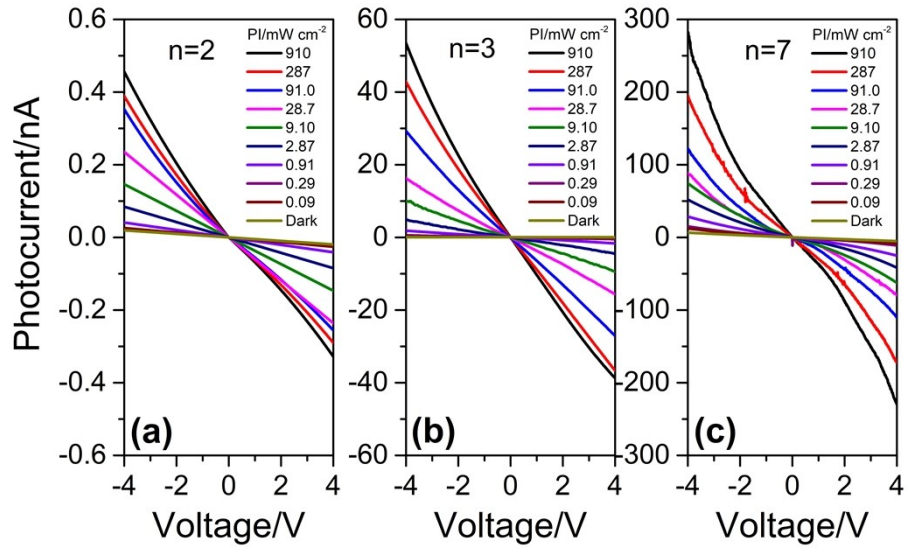

**Fig. S16.** I–V curves of photodetectors based on quasi-2D perovskites of #1 (a), #2 (b) and #3 (c), under different illumination intensities.
